## Correspondence:

# Mixed model association for biobank-scale data sets

Po-Ru Loh<sup>1,2</sup>, Gleb Kichaev<sup>3</sup>, Steven Gazal<sup>2,4</sup>, Armin P Schoech<sup>2,4,5</sup>, Alkes L Price<sup>2,4,6</sup>

<sup>1</sup> Division of Genetics, Department of Medicine, Brigham and Women's Hospital and Harvard Medical School, Boston, Massachusetts, USA.

<sup>2</sup> Program in Medical and Population Genetics, Broad Institute of MIT and Harvard, Cambridge, Massachusetts, USA.

<sup>3</sup> Bioinformatics Interdepartmental Program, University of California, Los Angeles, Los Angeles, California, USA.

<sup>4</sup> Department of Epidemiology, Harvard T.H. Chan School of Public Health, Boston, Massachusetts, USA.

<sup>5</sup> Department of Systems Biology, Harvard Medical School, Boston, Massachusetts, USA.

<sup>6</sup> Department of Biostatistics, Harvard T.H. Chan School of Public Health, Boston, Massachusetts, USA.

Correspondence should be addressed to P.-R.L. ([poruloh@broadinstitute.org](mailto:poruloh@broadinstitute.org)) or A.L.P. ([aprice@hsph.harvard.edu](mailto:aprice@hsph.harvard.edu)).

**Biobank-based genome-wide association studies are enabling exciting insights in complex trait genetics, but much uncertainty remains over best practices for optimizing statistical power and computational efficiency in GWAS while controlling confounders. Here, we introduce a much faster version of our BOLT-LMM Bayesian mixed model association method—capable of running analyses of the full UK Biobank cohort in a few days on a single compute node—and show that it produces highly powered, robust test statistics when run on all 459K European samples (retaining related individuals). When used to conduct a GWAS for height in UK Biobank, BOLT-LMM achieved power equivalent to linear regression on 650K samples—a 93% increase in effective sample size versus the common practice of analyzing unrelated British samples using linear regression (UK Biobank documentation; Bycroft et al. bioRxiv). Across a broader set of 23 highly heritable traits, the total number of independent GWAS loci detected increased from 5,839 to 10,759, an 84% increase. We recommend the use of BOLT-LMM (retaining related individuals) for biobank-scale analyses, and we have publicly released BOLT-LMM summary association statistics for the 23 traits analyzed as a resource for all researchers.**

To the Editor:

Despite recent work highlighting the advantages of linear mixed model (LMM) methods for genome-wide association studies in data sets containing relatedness or population structure [1–3], much uncertainty remains about best practices for optimizing GWAS power while controlling confounders. Several recent studies of the interim UK Biobank data set [4] (~150,000 samples) removed >20% of samples by applying filters for relatedness or genetic ancestry, and/or used linear regression in preference to mixed model association. These issues are exacerbated in the full UK Biobank data set (~500,000 samples), in which suggested sample exclusions decrease sample size by nearly 30% [5]. Here, we release a much faster version of our BOLT-LMM Bayesian mixed model association method [3] and show that it can be applied with minimal sample exclusions and achieves greatly superior power compared to common practices for analyzing UK Biobank data.

In analyses of 23 highly heritable UK Biobank phenotypes (Supplementary Table 1), we observed that BOLT-LMM (applied to all 459,327 European samples and ~20 million imputed variants passing QC) consistently achieved far greater association power than linear regression with principal component (PC) covariates (on 337,539 unrelated British samples, following ref. [5]), attaining an 84% increase in GWAS locus discovery (10,759 total independent loci versus 5,839; Fig. 1a and Supplementary Table 2). These gains in power were driven only partially by the increased number of samples analyzed; we observed that BOLT-LMM achieved effective sample sizes as high as ~700,000 by conditioning on polygenic predictions from genome-wide SNPs, which effectively reduces noise in an association test [2, 3, 6] (Fig. 1b, Supplementary Fig. 1, and Supplementary Table 3). The large sample size of the UK Biobank—which enables BOLT-LMM to predict and condition away up to 43% of phenotypic variance (Fig. 1b)—is now revealing the full power of this approach.

To verify that BOLT-LMM analyses of all European samples were robust to potential confounding due to relatedness or population structure, we performed LD score regression (LDSC) analyses [7] of association statistics computed using both BOLT-LMM (on all European samples) and linear regression (on unrelated British samples); we ran LDSC using the baselineLD model [8]. We observed that while the value of the LD score regression intercept [7] was generally difficult to interpret due to attenuation bias [3], which causes the intercept to rise above 1

with increased sample size and heritability (Supplementary Fig. 2 and Supplementary Note), the *attenuation ratio*— $(\text{LDSC intercept} - 1) / (\text{mean } \chi^2 - 1)$ —matched closely between BOLT-LMM and PC-corrected linear regression and was relatively small (Fig. 1c, Supplementary Fig. 2, and Supplementary Table 4). Across 23 traits, we observed similar mean attenuation ratios of 0.078 (s.e.m. 0.006) for PC-corrected linear regression and 0.082 (0.005) for BOLT-LMM, indicating that BOLT-LMM successfully controlled for sample structure (as expected for mixed model methods) [1–3]. In contrast, uncorrected linear regression produced a mean attenuation ratio of 0.104 (0.012), indicating slight confounding (Supplementary Fig. 2 and Supplementary Table 4). We note that attenuation ratios are broadly smaller under the LDSC baselineLD model [8], which incorporates functional and LD-related genome annotations, than under the original LDSC model (Supplementary Table 5), consistent with better model fit.

Our new release of the BOLT-LMM software (version 2.3) implements additional computational improvements that reduce running times by a factor of  $\sim 4x$  versus the previous version, achieving run time scaling close to linear in sample size and comparable to linear regression (a few days for UK Biobank analyses; Fig. 1d and Supplementary Table 6). Specifically, BOLT-LMM v2.3 performs much faster processing of imputed genotypes, which we discovered was the bottleneck for analyses of extremely large imputed data sets (e.g.,  $\sim 93$  million variants in the UK Biobank full release). To overcome this bottleneck, we implemented fast multi-threaded support for test statistic computation on imputed genotypes in the new BGEN v1.2 file format (Supplementary Note). Additionally, for analyses of very large data sets, we now recommend including principal component covariates for the purpose of increasing the rate of convergence of the iterative computations performed during BOLT-LMM’s model-fitting steps [3]. Projecting out top PCs (which can be computed rapidly using FastPCA [9]) improves the conditioning of the matrix computations that BOLT-LMM implicitly performs, roughly halving the number of iterations required for convergence (Supplementary Table 7).

Our results demonstrate the latent power that mixed model association analysis unlocks in very large GWAS, both by reducing the need for sample exclusions and by amplifying effective sample sizes via conditioning on polygenic predictions from genome-wide SNPs. Our new release of BOLT-LMM makes mixed model association computationally tractable even on extremely large data sets without the need for specialized computing infrastructure [10]. Our analyses also reveal

subtleties in the interpretation of LD score regression intercepts as a means of differentiating polygenicity from confounding in very large GWAS; we suggest that the attenuation ratio may be a more suitable metric as sample sizes continue to increase. Overall, these findings provide much-needed clarity to the GWAS community on analytical best practices for maximizing the value of the UK Biobank and other large biobanks.

**Code and data availability.** BOLT-LMM v2.3 is open-source software freely available at <http://data.broadinstitute.org/alkesgroup/BOLT-LMM/>. Access to the UK Biobank Resource is available via application (<http://www.ukbiobank.ac.uk/>). BOLT-LMM association statistics computed in this study are currently available for public download at <http://data.broadinstitute.org/alkesgroup/UKBB/> and have been submitted to the UK Biobank Data Showcase.

**Acknowledgments.** We are grateful to H. Finucane and Y. Reshef for helpful discussions. This research was conducted using the UK Biobank Resource under Application #10438 and was supported by US National Institutes of Health grants R01 HG006399, R01 GM105857, and R01 MH107649 (ALP), a Burroughs Wellcome Fund Career Award at the Scientific Interfaces (PL), and a Boehringer Ingelheim Fonds fellowship (APS). Computational analyses were performed on the Orchestra High Performance Compute Cluster at Harvard Medical School, which is partially supported by grant NCR1 1S10RR028832-01.

## References

1. Yu, J. *et al.* A unified mixed-model method for association mapping that accounts for multiple levels of relatedness. *Nature Genetics* **38**, 203–208 (2006).
2. Yang, J., Zaitlen, N. A., Goddard, M. E., Visscher, P. M. & Price, A. L. Advantages and pitfalls in the application of mixed-model association methods. *Nature Genetics* **46**, 100–106 (2014).
3. Loh, P.-R. *et al.* Efficient Bayesian mixed model analysis increases association power in large cohorts. *Nature Genetics* **47**, 284–290 (2015).
4. Sudlow, C. *et al.* UK Biobank: an open access resource for identifying the causes of a wide range of complex diseases of middle and old age. *PLOS Medicine* **12**, 1–10 (2015).
5. Bycroft, C. *et al.* Genome-wide genetic data on ~500,000 UK Biobank participants. *bioRxiv* (2017).
6. Listgarten, J. *et al.* Improved linear mixed models for genome-wide association studies. *Nature Methods* **9**, 525–526 (2012).
7. Bulik-Sullivan, B. *et al.* LD Score regression distinguishes confounding from polygenicity in genome-wide association studies. *Nature Genetics* **47**, 291–295 (2015).
8. Gazal, S. *et al.* Linkage disequilibrium dependent architecture of human complex traits reveals action of negative selection. *Nature Genetics* (2017).
9. Galinsky, K. J. *et al.* Fast principal-component analysis reveals convergent evolution of *ADH1B* in Europe and East Asia. *American Journal of Human Genetics* **98**, 456–472 (2016).
10. Canela-Xandri, O., Rawlik, K. & Tenesa, A. An atlas of genetic associations in UK Biobank. *bioRxiv* 176834 (2017).

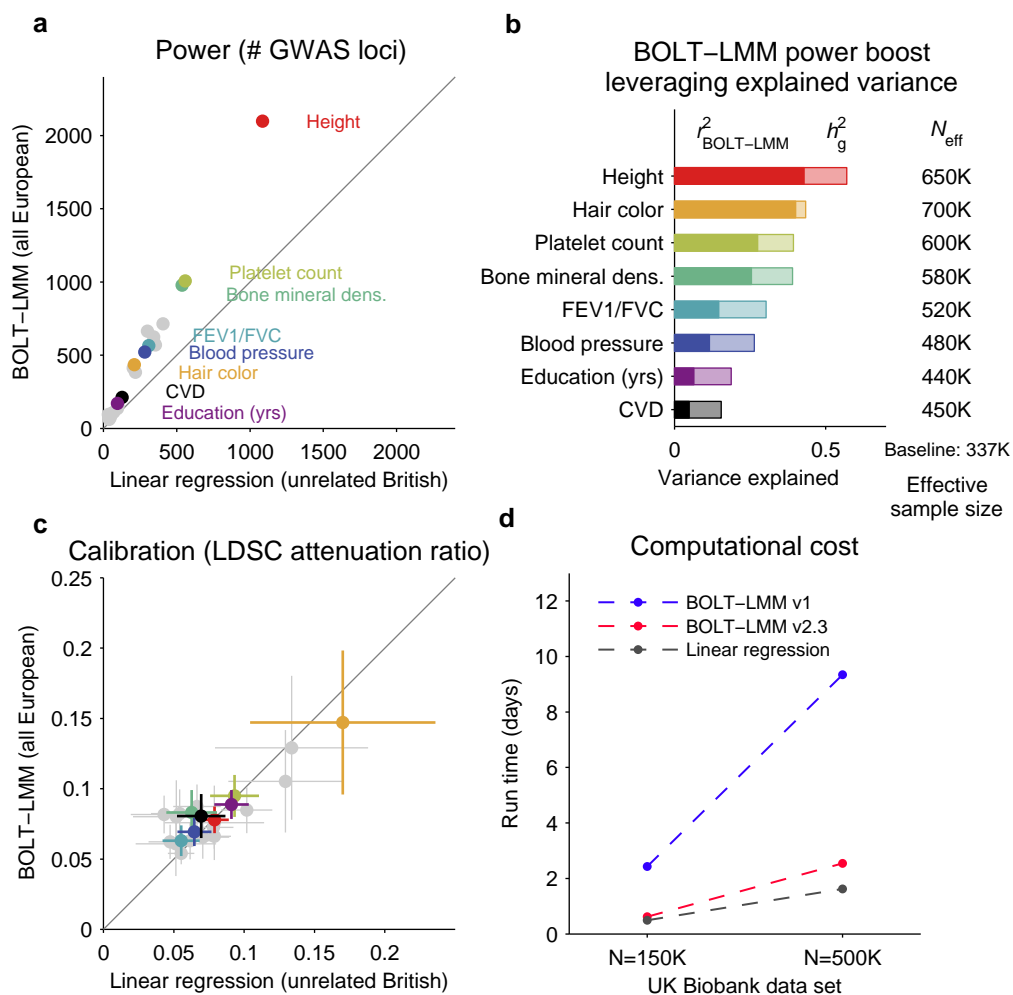

**Figure 1. Power, calibration, and speed of BOLT-LMM v2.3 in UK Biobank analyses.** (a) Numbers of independent genome-wide significant associations ( $p < 5 \times 10^{-9}$ ) identified by BOLT-LMM analyses of all European-ancestry individuals ( $N=459,327$ ) versus linear regression analyses of unrelated British individuals ( $N=337,539$ , following common practice [5]). Results for 23 phenotypes are plotted, with 8 representative phenotypes highlighted. (b) Variance explained by genome-wide SNPs on which BOLT-LMM implicitly conditions to increase power. Conditioning on BOLT-LMM’s polygenic predictions—which attain accuracy ( $r^2_{\text{BOLT-LMM}}$ ) approaching SNP-heritability ( $h_g^2$ ) for some traits—achieves effective sample sizes as high as  $\sim 700\text{K}$ . (We measured effective sample size by comparing  $\chi^2$  statistics at associated SNPs; Supplementary Note.) (c) Test statistic calibration of BOLT-LMM on all European individuals versus linear regression on unrelated British individuals (using 20 principal component covariates). Attenuation ratios from LD score regression [7, 8] match closely between the two methods, indicating that BOLT-LMM properly controls false positives (Supplementary Fig. 2). Error bars, jackknife s.e. (d) Computational cost of association analysis using BOLT-LMM v2.3, the previous version of BOLT-LMM [3], and linear regression (implemented efficiently within the BOLT-LMM software) on the UK Biobank  $N=150\text{K}$  and  $N=500\text{K}$  data releases. Analyses were run on 8 threads on a 2.10 GHz Intel Xeon E5-2683 v4 processor. Additional details and numerical data are provided in the Supplementary Note, Supplementary Fig. 1, and Supplementary Tables 1–7.
